# Supplementary material
Source: publisher figshare collection journal article supplement (https://karger.figshare.com/ndownloader/files/26201285)
Supplement: Supplementary file 1 [file 26201285]

**Supporting information**

**Table S1:** DRG codes

| **Type of code** | **Code number** | **Meaning of code** |
| --- | --- | --- |
| **Specialism code** | 0310 | Dermatology |
| **Type of DRG** | 11 | Initial DRG |
| 21 | Subsequent DRG |
| **Diagnosis code** | 14 | Cutaneous malignancies |
| **Product group** | 29499 | Neoplasms - melanoma / other malignant neoplasms skin / premalignant dermatoses |
| **Product** | 027 | Photodynamic therapy |
| 002 | Mohs micrographic surgery |
| 003/004/016/017/021/022 | Conventional excision (different types) |
| **Activity** | 190013/190060 | Outpatient clinic visit |
| **ATC-codes** | L01BC02 | 5-fluorouracil cream |
| D06BB10 | Imiquimod cream |

Abbreviations: DRG, diagnosis-related groups; ATC, Anatomical Therapeutic Chemical.
